# Supplementary material for: Whole Genome, Whole Population Sequencing Reveals That Loss of Signaling Networks Is the Major Adaptive Strategy in a Constant Environment
Source: PubMed Central journal article supplement (PMC3836717; doi:10.1371/journal.pgen.1003972), 2013-11-21
Supplement: pgen.1003972.s002.pdf [file pgen.1003972.s002.pdf]

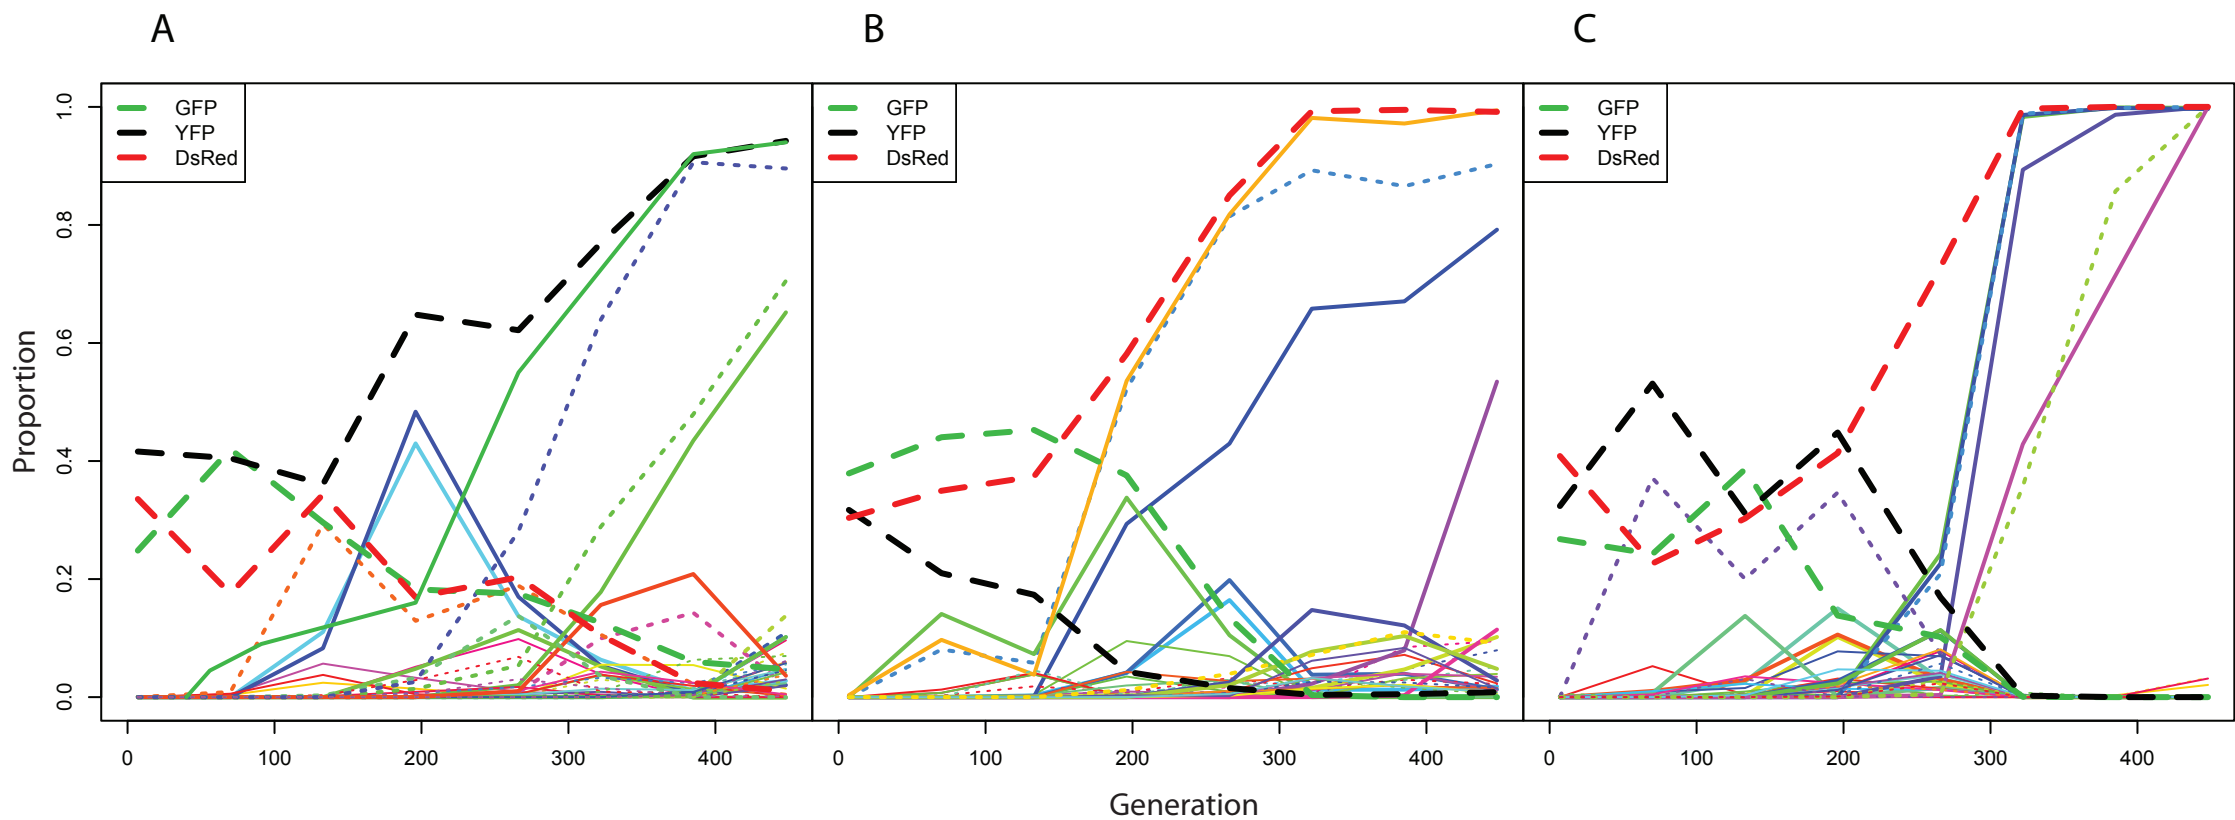

**Supplementary Figure 2**
