# Supplementary material for: Whole Genome, Whole Population Sequencing Reveals That Loss of Signaling Networks Is the Major Adaptive Strategy in a Constant Environment
Source: PubMed Central journal article supplement (PMC3836717; doi:10.1371/journal.pgen.1003972), 2013-11-21
Supplement: pgen.1003972.s006.pdf [file pgen.1003972.s006.pdf]

Supplementary Table 1.

| Generation | E1   |        | E2  |        | E3  |        |
|------------|------|--------|-----|--------|-----|--------|
|            | OL   | non-OL | OL  | non-OL | OL  | non-OL |
| 7          | 594  | 60     | 266 | 22     | 562 | 76     |
| 70         | 791  | 118    | 312 | 27     | 516 | 74     |
| 133        | 867  | 111    | 288 | 23     | 459 | 59     |
| 196        | 832  | 118    | 302 | 26     | 516 | 111    |
| 266        | 902  | 152    | 358 | 41     | 610 | 78     |
| 322        | 821  | 120    | 371 | 44     | 531 | 94     |
| 385        | 1013 | 420    | 339 | 48     | 476 | 42     |
| 448        | 1046 | 447    | 452 | 88     | 637 | 103    |
