# Supplementary material for: Whole Genome, Whole Population Sequencing Reveals That Loss of Signaling Networks Is the Major Adaptive Strategy in a Constant Environment
Source: PubMed Central journal article supplement (PMC3836717; doi:10.1371/journal.pgen.1003972), 2013-11-21
Supplement: pgen.1003972.s007.pdf [file pgen.1003972.s007.pdf]

Table S2.

| Mutations in E1 |          |                                         |                      |                       |        |                         | Allele frequency at given generation |                |            |             |            |            |            |            |            |            |
|-----------------|----------|-----------------------------------------|----------------------|-----------------------|--------|-------------------------|--------------------------------------|----------------|------------|-------------|------------|------------|------------|------------|------------|------------|
| Chromosome      | Position | Ref Allele                              | Alt Allele           | Gene(s)               | Effect | Amino Acid Change       | Codon Change                         | Codon Position | 7          | 70          | 133        | 196        | 266        | 322        | 385        | 448        |
| chr01           | 39261G   | A                                       | GPB2                 | START_LOST            | M/I    | atG/ata                 |                                      | 1              | 0          | 0.05243459  | 0.00385286 | 0.01013128 | 0          | 0          | 0          | 0          |
| chr01           | 39425A   | G                                       | GPB2                 | NON_SYNONYMOUS_CODING | Y/C    | tAt/gT                  |                                      | 56             | 0.00286123 | 0.00088731  | 0.0019861  | 0          | 0          | 0          | 0.00313152 | 0.02065728 |
| chr01           | 39834G   | A                                       | GPB2                 | STOP_GAINED           | W/*    | tgG/tgA                 |                                      | 192            | 0          | 0.00215916  | 0.10195227 | 0.02235031 | 0          | 0          | 0          | 0          |
| chr03           | 235882C  | A                                       | SED4                 | SYNONYMOUS_CODING     | V/V    | gtG/gT                  |                                      | 147            | 0          | 0           | 0          | 0          | 0          | 0          | 0.0018315  | 0.03259827 |
| chr04           | 111908T  | C                                       | SNF3                 | NON_SYNONYMOUS_CODING | L/S    | tTa/tCa                 |                                      | 110            | 0          | 0.02696178  | 0.15031983 | 0.03079397 | 0          | 0          | 0          | 0          |
| chr04           | 112109G  | C                                       | SNF3                 | NON_SYNONYMOUS_CODING | S/T    | gtG/tct                 |                                      | 177            | 0.01041667 | 0.02896725  | 0.10597826 | 0.03001201 | 0          | 0          | 0          | 0          |
| chr04           | 214167T  | C                                       | RG72                 | NON_SYNONYMOUS_CODING | Y/H    | Tac/Tac                 |                                      | 273            | 0          | 0.00787402  | 0.0270907  | 0.0020141  | 0          | 0          | 0          | 0          |
| chr04           | 1014422C | G                                       | MTH1                 | NON_SYNONYMOUS_CODING | W/C    | tgC/tGc                 |                                      | 427            | 0          | 0.01152074  | 0.0780379  | 0.00111982 | 0          | 0          | 0          | 0          |
| chr04           | 1014457G | T                                       | MTH1                 | NON_SYNONYMOUS_CODING | Q/K    | Cag/Aag                 |                                      | 416            | 0          | 0.00936768  | 0.0265252  | 0.0025428  | 0          | 0          | 0          | 0          |
| chr04           | 1014707A | C                                       | MTH1                 | STOP_GAINED           | Y/*    | tAt/tAg                 |                                      | 332            | 0.0089172  | 0.0154355   | 0.07751092 | 0.06924644 | 0.00321888 | 0          | 0          |            |
| chr04           | 1014740G | C                                       | MTH1                 | NON_SYNONYMOUS_CODING | C/W    | tgG/tGc                 |                                      | 106            | 0          | 0.0031679   | 0.02200995 | 0.2428727  | 0.98303287 | 0.99913345 | 0.99823789 |            |
| chr04           | 1014770G | T                                       | MTH1                 | STOP_GAINED           | Y/*    | tac/taA                 |                                      | 311            | 0          | 0.00703235  | 0.1376038  | 0.00134048 | 0.01568154 | 0          | 0          | 0          |
| chr04           | 1014968A | T                                       | MTH1                 | STOP_GAINED           | Y/*    | taT/taA                 |                                      | 245            | 0.00158211 | 0.00254586  | 0.03146342 | 0.01408237 | 0          | 0          | 0          | 0          |
| chr04           | 1014997G | A                                       | MTH1                 | STOP_GAINED           | Q/*    | Cag/Tag                 |                                      | 236            | 0          | 0.0042735   | 0.02406015 | 0.0262069  | 0          | 0          | 0.00088968 | 0          |
| chr04           | 1015236A | C                                       | MTH1                 | STOP_GAINED           | L/*    | tTa/tCa                 |                                      | 156            | 0.01077326 | 0.02243313  | 0.01414877 | 0.01258851 | 0.0008881  | 0          | 0          | 0          |
| chr04           | 1015286G | T                                       | MTH1                 | STOP_GAINED           | S/*    | tCa/taA                 |                                      | 106            | 0.00455581 | 0.03518124  | 0.02350176 | 0.01195219 | 0          | 0          | 0          | 0          |
| chr09           | 400837T  | TACTGGCATCCATTACTC                      | DAL81                | CODON_DELETION        | S/S    | lccattactactactgagctata |                                      | 357            | 0          | 0           | 0          | 0.035197   | 0.893491   | 0.986711   | 1          | 1          |
| chrmt           | 28320T   | C                                       | ATP6                 | UPSTREAM              |        |                         |                                      | 0.00536089     | 0.00116357 | 0.00217971  | 0.00320859 | 0.00163258 | 0.00757479 | 0.0006589  | 0.00031782 |            |
| chr06           | 70288A   | T                                       | RM15                 | STOP_GAINED           | Y/*    | taT/taA                 |                                      | 1380           | 0          | 0.01666281  | 0.03787879 | 0.00121655 | 0          | 0          | 0          | 0          |
| chr06           | 71396G   | C                                       | RM15                 | STOP_GAINED           | Y/*    | taC/tAg                 |                                      | 1014           | 0          | 0           | 0          | 0          | 0          | 0.00066181 | 0.03151674 |            |
| chr10           | 438286A  | C                                       | CR1                  | NON_SYNONYMOUS_CODING | S/R    | AgT/gct                 |                                      | 1044           | 0.37113402 | 0           | 0.3466026  | 0.07276507 | 0.0022805  | 0          | 0          | 0          |
| chr11           | 367181A  | G                                       | RG71                 | NON_SYNONYMOUS_CODING | Y/C    | tAt/gT                  |                                      | 526            | 0          | 0.00271003  | 0.01768708 | 0.04111246 | 0          | 0          | 0.0078927  | 0          |
| chr11           | 367297G  | C                                       | RG71                 | NON_SYNONYMOUS_CODING | V/L    | GtT/Ct                  |                                      | 565            | 0          | 0.00242131  | 0.02706746 | 0.08089097 | 0.00131234 | 0          | 0          | 0          |
| chr11           | 367328T  | G                                       | RG71                 | NON_SYNONYMOUS_CODING | L/W    | tTg/tGg                 |                                      | 575            | 0          | 0.002751323 | 0.11285267 | 0.00115741 | 0          | 0          | 0          | 0          |
| chr12           | 54429T   | C                                       | VP53                 | NON_SYNONYMOUS_CODING | V/V    | Att/GTt                 |                                      | 3073           | 0.00114417 | 0.01816118  | 0.01256545 | 0          | 0          | 0          | 0          | 0          |
| chr12           | 11312TAA | TCAAT                                   | SSK1                 | FRAME_SHIFT           |        |                         |                                      | 0              | 0          | 0           | 0.22638    | 0.986335   | 0.998209   | 0.998209   | 0.996253   |            |
| chr12           | 200286C  | T                                       | ADE12                | NON_SYNONYMOUS_CODING | G/R    | Ggg/Agg                 |                                      | 344            | 0          | 0           | 0          | 0.2084474  | 0.9847631  | 0.99826087 | 1          |            |
| chr12           | 372230G  | A                                       | HOG1                 | NON_SYNONYMOUS_CODING | G/D    | gGt/gAt                 |                                      | 204            | 0          | 0.01220505  | 0.07127273 | 0          | 0          | 0          | 0          | 0          |
| chr12           | 372319G  | T                                       | HOG1                 | STOP_GAINED           | G/*    | Gga/Tga                 |                                      | 234            | 0          | 0.02328042  | 0.11365807 | 0.0010977  | 0          | 0          | 0          | 0          |
| chr13           | 302056   | TCACGACCAACATCGACAC<br>GCAAGTTTGAAGATTG | ERG5                 | CODON_DELETION        |        |                         |                                      | 143            | 0          | 0           | 0          | 0          | 0.00361011 | 0.42857143 | 0.71428571 | 1          |
| chr14           | 440309C  | A                                       | RS2                  | NON_SYNONYMOUS_CODING | V/F    | GtT/tTt                 |                                      | 88             | 0          | 0           | 0          | 0.02726473 | 0          | 0          | 0          | 0          |
| chr14           | 684890A  | A                                       | SSK2                 | STOP_GAINED           | E/*    | Gag/Tag                 |                                      | 152            | 0          | 0.00324675  | 0.04701835 | 0.04468719 | 0.00109649 | 0          | 0          | 0          |
| chr15           | 301909G  | A                                       | HRD1                 | NON_SYNONYMOUS_CODING | P/L    | cCt/tCt                 |                                      | 376            | 0          | 0           | 0.00214753 | 0.0268023  | 0.00223559 | 1.61E-05   | 0          | 0          |
| chr15           | 3285T    | A                                       | CR5_YOR029W          | UPSTREAM              |        |                         |                                      | 0              | 0.00120919 | 0.03067485  | 0.00119561 | 0          | 0          | 0          | 0          | 0          |
| chr15           | 438512A  | C                                       | YOR059C_Gene TKLUU10 | DOWNSTREAM_UPSTREAM   |        |                         |                                      | 0              | 0          | 0.0049505   | 0.35714286 | 0.85714286 | 1          | 1          | 1          |            |
| chr16           | 428459A  | G                                       | VP528                | NON_SYNONYMOUS_CODING | H/R    | cAt/cGt                 |                                      | 178            | 0          | 0.00434153  | 0.05670103 | 0.00136054 | 0          | 0          | 0          | 0          |
| chr16           | 522341T  | G                                       | SWI1                 | NON_SYNONYMOUS_CODING | L/R    | cTt/cGt                 |                                      | 443            | 0          | 0.00104275  | 0.02341137 | 0          | 0          | 0          | 0          | 0          |

| Mutations in E2 |          |            |                   |                       |        |                   | Allele frequency at given generation |                |            |            |             |            |            |            |            |     |
|-----------------|----------|------------|-------------------|-----------------------|--------|-------------------|--------------------------------------|----------------|------------|------------|-------------|------------|------------|------------|------------|-----|
| Chromosome      | Position | Ref Allele | Alt Allele        | Gene(s)               | Effect | Amino Acid Change | Codon Change                         | Codon Position | 7          | 70         | 133         | 196        | 266        | 322        | 385        | 448 |
| chr01           | 39261G   | A          | GPB2              | START_LOST            | M/I    | atG/ata           |                                      | 1              | 0          | 0.00294772 | 0.04086741  | 0.16442322 | 0.012442   | 0.01722351 | 0.01787002 |     |
| chr03           | 184888C  | A          | BPH1              | NON_SYNONYMOUS_CODING | S/Y    | tCt/tAt           |                                      | 1790           | 0          | 0.00766284 | 0.02208202  | 0.02578797 | 0.04       | 0.04456311 |            |     |
| chr04           | 112987G  | T          | SNF3              | NON_SYNONYMOUS_CODING | V/F    | GtT/tTt           |                                      | 470            | 0.00719425 | 0.03861004 | 0           | 0          | 0          | 0          | 0          | 0   |
| chr04           | 214167T  | C          | RG72              | NON_SYNONYMOUS_CODING | Y/H    | Tac/Tac           |                                      | 273            | 0          | 0.00403226 | 0.09507042  | 0.06944444 | 0          | 0          | 0          | 0   |
| chr04           | 1014763T | G          | MTH1              | NON_SYNONYMOUS_CODING | N/H    | AsT/cAt           |                                      | 314            | 0          | 0.01665667 | 0.19834711  | 0.03794038 | 0.03951368 | 0.0131579  |            |     |
| chr04           | 1014850T | A          | MTH1              | STOP_GAINED           | R/*    | Aga/Tga           |                                      | 285            | 0          | 0.00126597 | 0.042957695 | 0.6584417  | 0.67056437 | 0.79198941 |            |     |
| chr04           | 1014958G | A          | MTH1              | STOP_GAINED           | E/*    | Gag/Tag           |                                      | 249            | 0.00724638 | 0.03829787 | 0           | 0          | 0          | 0          | 0          |     |
| chr04           | 1015139A | T          | MTH1              | STOP_GAINED           | C/*    | tGt/tGg           |                                      | 188            | 0          | 0          | 0.03485255  | 0.00902935 | 0          | 0          | 0          | 0   |
| chr04           | 1015401G | T          | MTH1              | STOP_GAINED           | S/*    | tCa/taA           |                                      | 101            | 0.01282051 | 0.04089249 | 0           | 0.00208817 | 0          | 0          | 0          | 0   |
| chr04           | 1015447T | A          | MTH1              | STOP_GAINED           | K/*    | Aaa/taA           |                                      | 86             | 0          | 0.00355872 | 0.0292526   | 0.04892966 | 0.07166124 | 0.02320186 |            |     |
| chr04           | 1393816C | A          | RM72              | SYNONYMOUS_CODING     | G/G    | ggG/gGt           |                                      | 253            | 0          | 0.0070922  | 0.01683393  | 0.05275705 | 0.08459215 | 0.0950324  |            |     |
| chrmt           | 5237AG   | A          |                   | DELETION              |        |                   |                                      | 0.080673       | 0.058112   | 0.52224    | 0.814544    | 0.892617   | 0.865747   | 0.903259   |            |     |
| chrmt           | 48457T   | C          | Gene ISUGAQZ_VARI | DOWNSTREAM_UPSTREAM   |        |                   |                                      | 0.00034389     | 0.01013765 | 0.1205405  | 0.00651069  | 0.0040732  | 0          | 0          |            |     |
| chr06           | 71813A   | C          | RM15              | NON_SYNONYMOUS_CODING | M/R    | tTg/tGg           |                                      | 872            | 0          | 0.14089347 | 0.07231657  | 0.33797909 | 0.10479042 | 0          | 0          | 0   |
| chr07           | 31970G   | A          | RM1               | NON_SYNONYMOUS_CODING | E/K    | Gag/Aag           |                                      | 21             | 0.0027027  | 0.01829268 | 0.00808525  | 0.03217822 | 0.01474202 | 0.02956989 | 0.0227172  |     |
| chr07           | 146779T  | C          | CDC55             | NON_SYNONYMOUS_CODING | D/G    | gAc/gGc           |                                      | 204            | 0.00343643 | 0.09703504 | 0.03801117  | 0.53881662 | 0.19518101 | 0.97186701 | 0.99420849 |     |
| chr08           | 368657A  | C          | ECM14             | NON_SYNONYMOUS_CODING | V/D    | Tac/Gac           |                                      | 380            | 0          | 0          | 0.004       | 0.00835655 | 0.00537634 | 0.04692082 | 0.07940447 |     |
| chr10           | 117822G  | A          | P82               | NON_SYNONYMOUS_CODING | P/S    | CtT/tCt           |                                      | 528            | 0          | 0.00322581 | 0.00952381  | 0.03646037 | 0.01160093 | 0.04057279 | 0.0186957  |     |
| chr10           | 619248A  | T          | VP52              | STOP_GAINED           | C/*    | Ggg/Tga           |                                      | 344            | 0          | 0          | 0.00325733  | 0          | 0.015628   | 0.0466975  | 0.0454546  |     |
| chr10           | 619248A  | T          | VP52              | NON_SYNONYMOUS_CODING | L/P    | tCt/cCt           |                                      | 173            | 0          | 0.04545455 | 0.00302135  | 0.02941177 | 0.00715991 | 0.02898551 | 0.0510215  |     |
| chr11           | 367541G  | T          | RG71              | NON_SYNONYMOUS_CODING | C/F    | tGt/tTt           |                                      | 646            | 0.00245098 | 0.00278552 | 0.01975309  | 0.0286346  | 0          | 0          | 0          | 0   |
| chr11           | 368053G  | A          | RG71              | NON_SYNONYMOUS_CODING | E/K    | Gaa/taA           |                                      | 817            | 0          | 0.04271357 | 0.02702703  | 0.03151261 | 0.01818182 | 0.01570681 |            |     |
| chr12           | 162282G  | A          | SSK1              | STOP_GAINED           | E/*    | Gaa/taA           |                                      | 538            | 0          | 0          | 0           | 0          | 0          | 0.03188406 | 0.03929273 |     |
| chr12           | 162807T  | A          | SSK1              | STOP_GAINED           | S/*    | taT/taA           |                                      | 307            | 0          | 0          | 0           | 0          | 0          | 0.02272727 | 0.0925408  |     |
| chr12           | 162807T  | A          | SSK1              | STOP_GAINED           | Q/*    | CaA/taA           |                                      | 363            | 0          | 0          | 0.01044386  | 0.01358966 | 0.0204897  | 0.00809717 |            |     |
| chr12           | 162975G  | A          | SSK1              | STOP_GAINED           | Q/*    | Cag/Tag           |                                      | 307            | 0          | 0          | 0.00208768  | 0.03207547 | 0.03981265 | 0.03448276 |            |     |
| chr12           | 909689C  | T          | COX8_C59          | DOWNSTREAM_DOWNSTREAM |        |                   |                                      | 0              | 0.00444444 | 0.0035461  | 0.03021148  | 0.01602564 | 0.00571429 |            |            |     |
| chr13           | 302398C  | T          | CGCTAC_ERG5       | CODON_INSERTION       |        |                   |                                      | 30             | 0          | 0          | 0           | 0          | 0.00307692 | 0.11439114 |            |     |
| chr14           | 68202C   | T          | SSK2              | STOP_GAINED           | W/*    | tGg/tAg           |                                      | 1509           | 0          | 0          | 0.00592338  | 0.02608066 | 0.02479339 | 0.01601831 |            |     |
| chr14           | 681026T  | G          | SSK2              | NON_SYNONYMOUS_CODING | T/P    | Act/CtT           |                                      | 1470           | 0          | 0          | 0.02475248  | 0.14761905 | 0.12142857 | 0.02819557 |            |     |
| chr14           | 684767G  | A          | SSK2              | STOP_GAINED           | Q/*    | Cag/Tag           |                                      | 223            | 0          | 0          | 0.00232558  | 0.01455302 | 0.01110818 | 0.00606061 |            |     |
| chr15           | 412148G  | T          | WH12              | STOP_GAINED           | E/*    | Gaa/taA           |                                      | 427            | 0          | 0          | 0.0240816   | 0.07692308 | 0.0361446  | 0.04789272 |            |     |
| chr15           | 412274C  | T          | WH12              | STOP_GAINED           | R/*    | Cga/Tga           |                                      | 469            | 0          | 0.00310    |             |            |            |            |            |     |
