# Supplementary material for: Whole Genome, Whole Population Sequencing Reveals That Loss of Signaling Networks Is the Major Adaptive Strategy in a Constant Environment
Source: PLOS journal article supplement (doi:10.1371/journal.pgen.1003972), 2013-11-21
Supplement: S3 (10.1371/journal.pgen.1003972.s003) [file journal.pgen.1003972.s003]

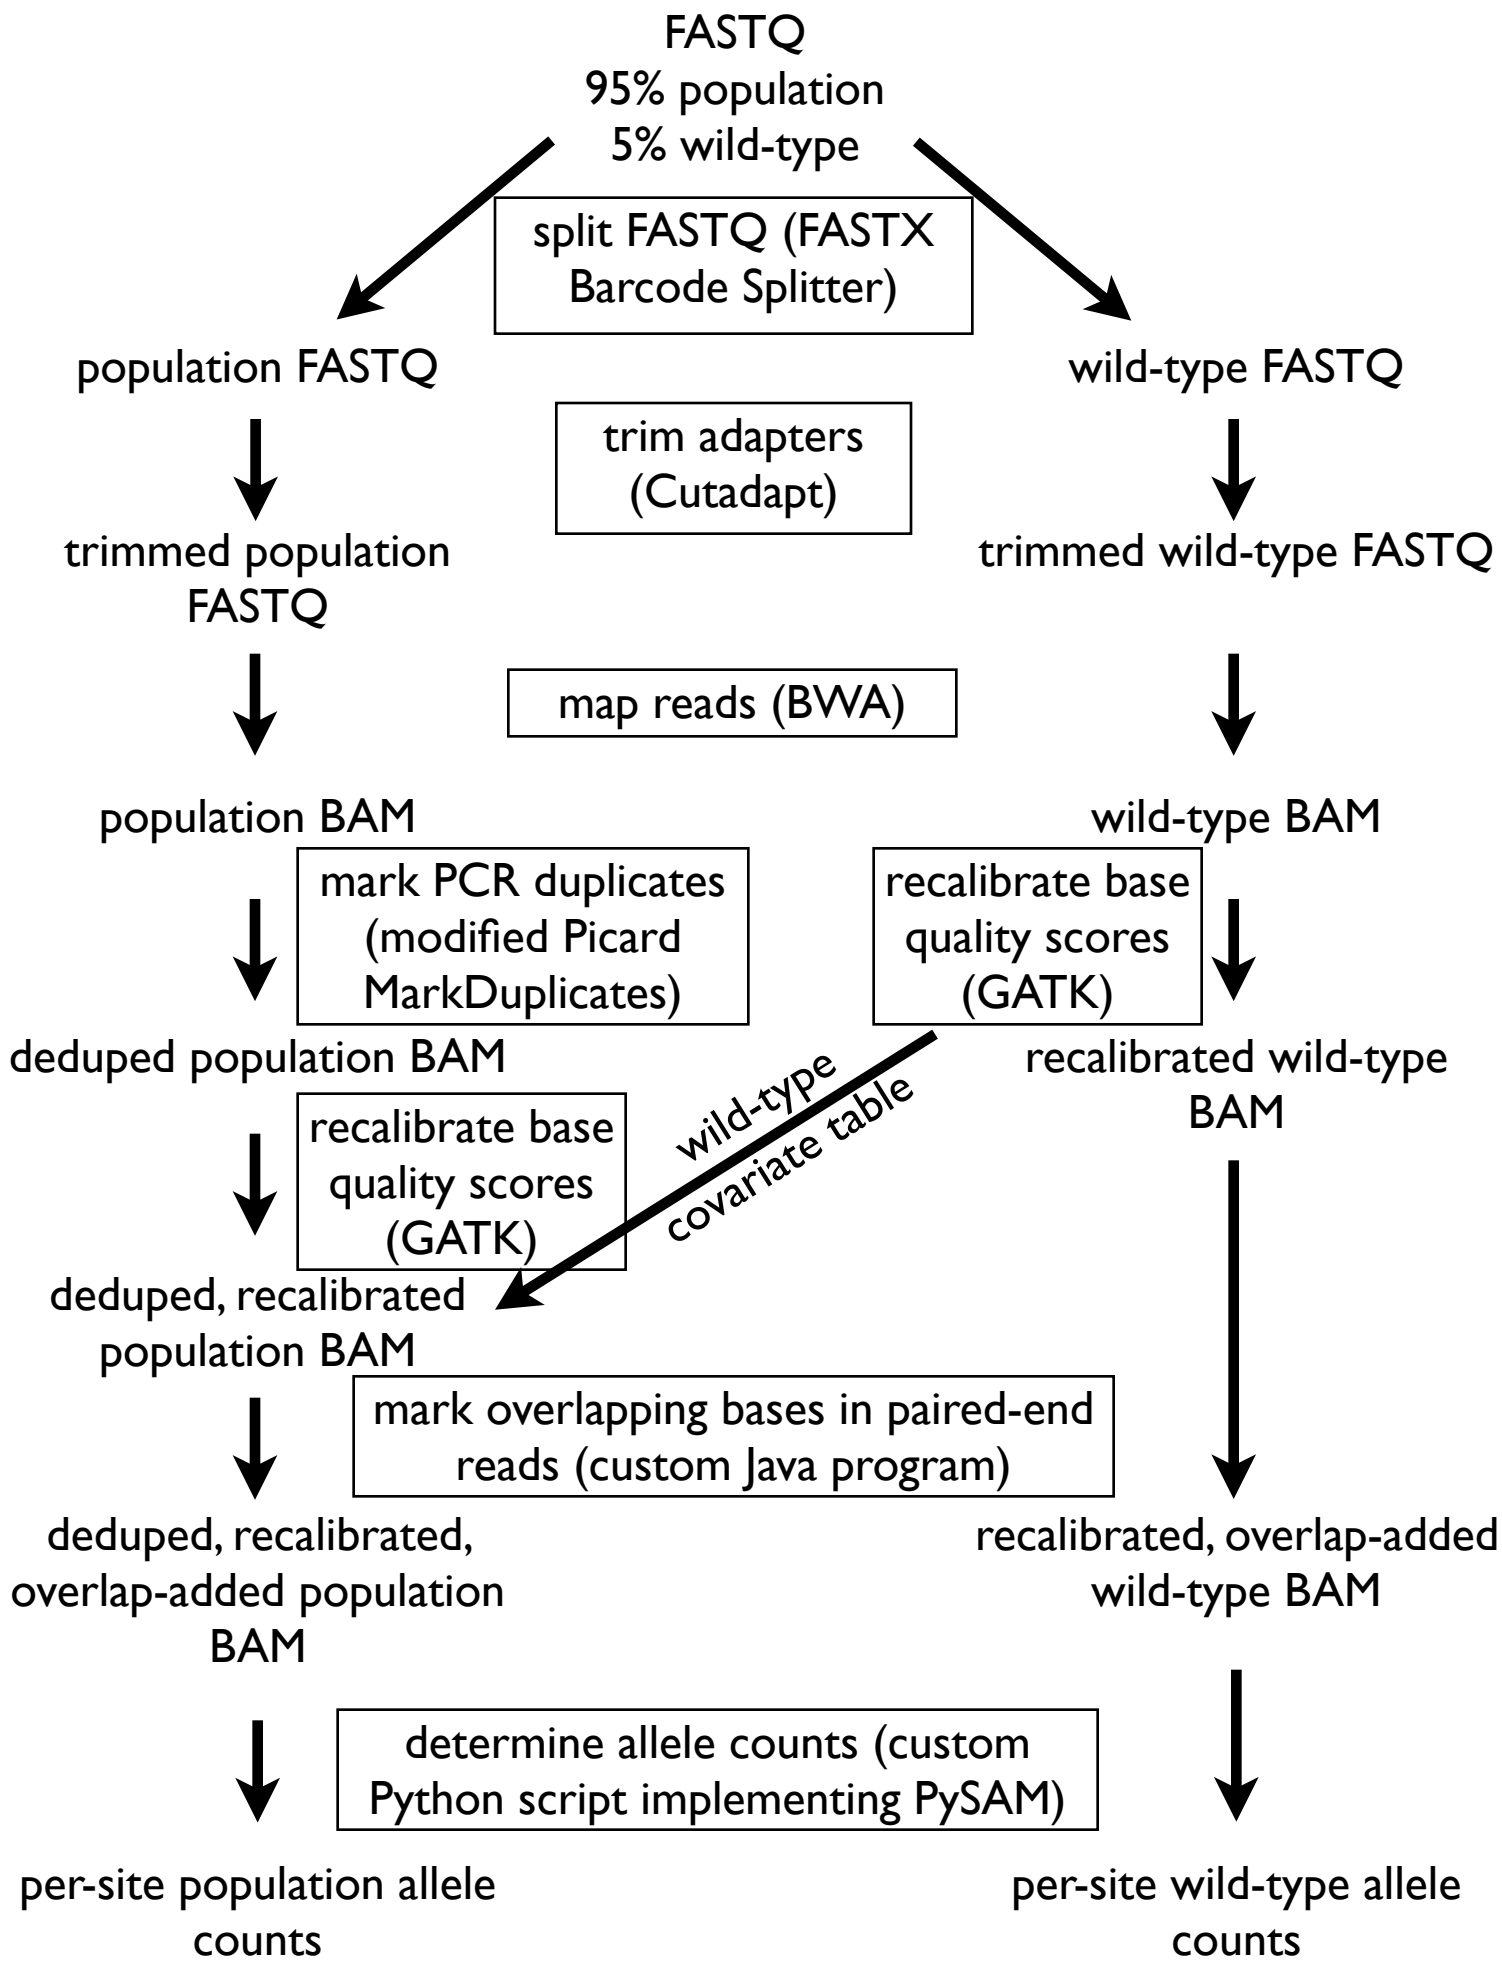

per-site population allele  
counts

per-site wild-type allele  
counts

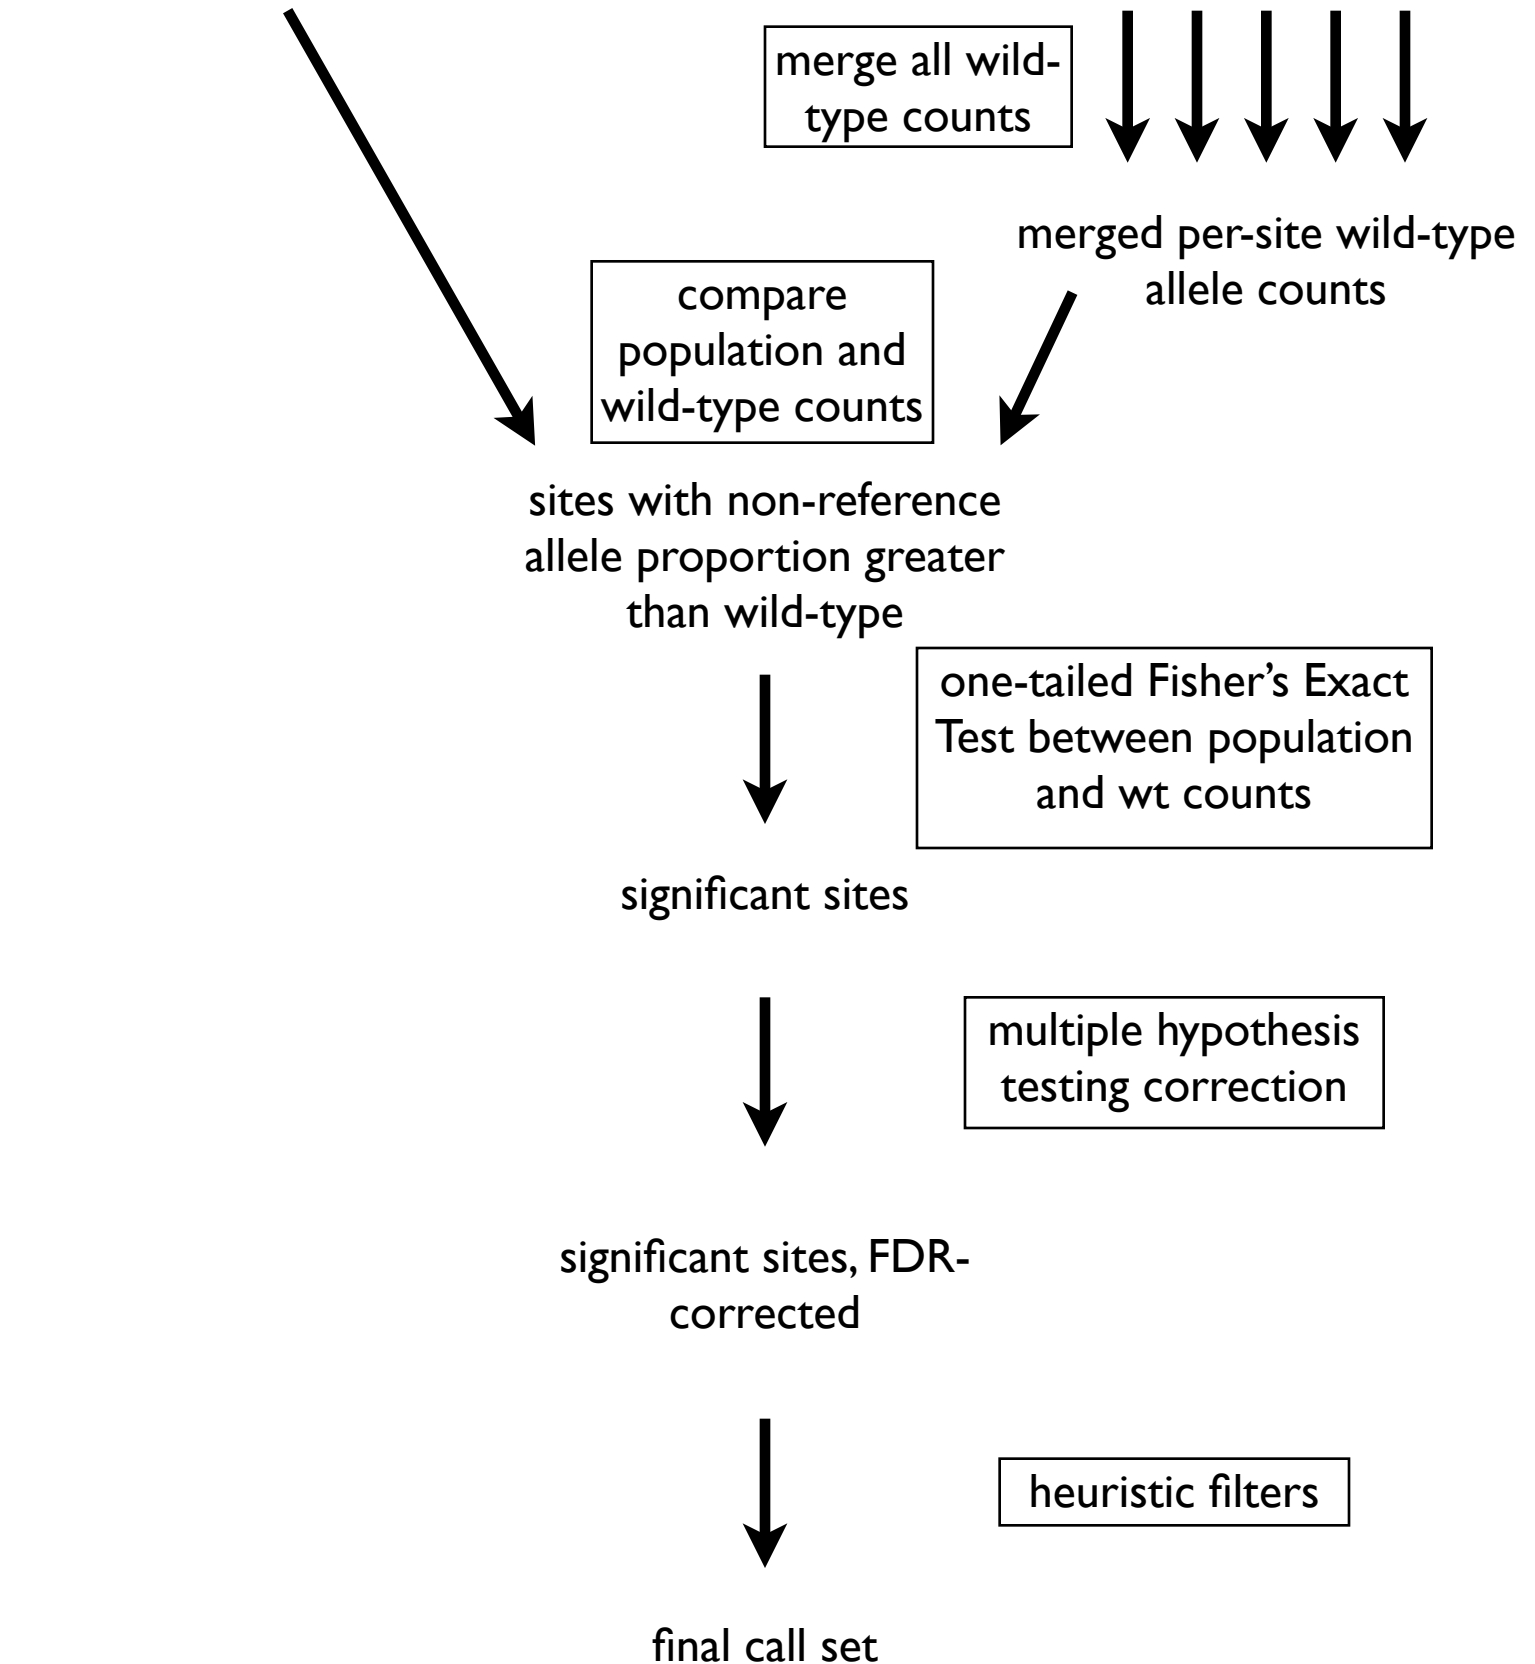

**Supplementary Figure 3.**
